# Supplementary material
Source: HighWire-hosted journal article supplement (https://adc.bmj.com/content/archdischild-2023-326756)
Supplement: inline-supplementary-material-1 [file inline-supplementary-material-1.pdf]

## **Utility and acceptability of remote 6-lead electrocardiographic monitoring in children with inherited cardiac conditions**

### **Web Appendix 1: Additional statistical methodology and results**

#### **Additional statistical methods**

##### *Sensitivity analysis*

A sensitivity analysis was conducted, removing potential overestimation of QTc (difference between QTc measures assessed by two methods  $\geq 40$ ms (1)).

##### *Interobserver variability*

Interobserver variability for continuous variables was assessed using the Intraclass Correlation Coefficient derived from a linear mixed model with random intercepts for participants and observers, and using the Kappa statistic with McNemar's test for trend for categorical variables.

#### **Additional results**

##### *Sensitivity analyses*

In comparing the QTc measures from the 12-lead ECG versus the supervised KM6LECG and the supervised versus unsupervised KM6LECG there were five individuals and eight individuals, respectively, with a difference between QTc measures of  $\geq 40$ ms. These observations were subsequently removed in the sensitivity analysis. In comparing the 12-lead ECG and KM6LECG, the results remained similar to those of the main finding (*ICC* of sensitivity analyses and main result: 0.895 and 0.839, respectively). Sensitivity analyses

reported an improved reliability comparing supervised and unsupervised KM6LECG (finding *ICC* of sensitivity analyses and main result: 0.882 and 0.736, respectively).

#### *Interobserver variability*

For the subset of children with measures by two observers, there was high correlation for the QTc as calculated from the KM6LECG (*ICC* = 0.92). In comparing the combined categorical variables from the KM6LECG, the following values were obtained ‘any repolarisation abnormality’ (n=13, kappa 0.5, McNemar’s test p value 0.564), ‘HCM-suggestive features shown’ (n=5, kappa 1.0, McNemar’s test p value 1.0) , either prolonged QTc and/or abnormal T-wave morphology (n=13, kappa 0.69, McNemar’s test p value 1.0).

#### **Reference**

1. Beers LVA, L. P., Himmelreich, J. C. L., Karregat, E. P. M., de Jong, J. S. S. G., Postema, P. G., de Groot, J. R., Lucassen, W. A. M., & Harskamp, R. E. Manual QT interval measurement with a smartphone-operated single-lead ECG versus 12-lead ECG: a within-patient diagnostic validation study in primary care. *BMJ Open*,. 2021;**11**:e055072–e Online.
